# Supplementary material for: Chromosome evolution screens recapitulate tissue-specific tumor aneuploidy patterns
Source: Springer Nature journal article supplement (doi:10.1038/s41588-024-01665-2), 2024-02-22
Supplement: MOESM1 [file 41588_2024_1665_MOESM1_ESM.pdf]

---

# Chromosome evolution screens recapitulate tissue-specific tumor aneuploidy patterns

---

In the format provided by the  
authors and unedited

**Supplementary Table 1** Acquired mutations during *in vitro* evolution experiments across all sequenced clones.

**Supplementary Table 2** Mutations present in parental hTERT-HMEC population, from which all clones were derived.

**Supplementary Table 3** All SVs acquired during *in vitro* evolution experiments across all sequenced clones.

**Supplementary Table 4** Curated Notch Activation and Repression gene sets.

**Supplementary Movie 1** Simulation of Notch-ON/Notch-OFF pattern formation in 40x40 cell lattice. Left panel: WT 1q control mono-culture experiment (50% WT 1q + 50% WT 1q homogenous population). Middle panel: WT 1q vs +1q co-culture experiment (50% WT 1q + 50% +1q mixed population). Right panel: +1q mono-culture experiment (50% +1q + 50% +1q homogenous population)
